# Supplementary material
Source: publisher figshare collection journal article supplement (https://frontiersin.figshare.com/ndownloader/files/25090904)
Supplement: Supplementary file 1 [file 25090904]

## Sheet: PrimaryDataBaseline
Station	SampleDate	Month	Season	Depth (decibar)	Primprod_day (µmol C dm^-3 day^-1)	PP_above detection	SE Primprod	Oxygen consumption µmol dm⁻³ d⁻¹	Ox, Conc, Slope ±95% c,i, µmol dm⁻³ d⁻¹	Oxy outlier	Total N (μM)	NO3 (μM)	NO2 (μM)	NH4 (μM)	Total P (μM)	PO4 P (μM)	SiO4 (μM)	DOC (μM)	BactGrowth (cells dm^-3 d^-1)	BactGrowth (µg C dm^-3 day^-1)	BactGrowth (µmol C dm^-3 day^-1)	Temperature (ºC)	Waterflow[m3/d] at date	Salinity (psu)	CV Primprod
B3	2014-01-15	January	Winter	1	0.0327713	0	0.0160687	6.288	0.0439177	1	20.13	6.16	0.16	0.23	0.48	0.31	33.54	368	91840003	1.56	0.13	0.884	1209600	4.245	0.490329
B3	2014-01-15	January	Winter	5	0.00159487	0	0.000782011	6.816	0.0417023	1	19.99	6.1	0.16	0.25	0.48	0.32	33.65	379	93053336	1.56	0.13	-0.136	1209600	4.194	0.490329
B3	2014-01-15	January	Winter	15	0	0		4.176	0.0472878	1	19.06	4.54	0.11	0.16	0.55	0.33	25.46	347	44240001	0.72	0.06	1.772	1209600	4.792	#DIV/0!
B3	2014-01-15	January	Winter	20	0	0		5.184	0.0209391	1	18.63	5.15	0.11	0.17	0.58	0.43	24.07	362	45080002	0.72	0.06	2.21	1209600	5.023	#DIV/0!
B7	2014-02-13	February	Winter	1	0.0305245	0	0.0156923	4.56	0.0673474	1	18.63	6.61	0.12	0.2	0.36	0.15	34.54		33508220	0.48	0.04	-0.207	959040	3.529	0.514088
B7	2014-02-13	February	Winter	5	0.00162581	0	0.000849335	3.024	0.0436034	1	18.42	6.62	0.11	0.13	0.27	0.15	34.64		37272157	0.6	0.05	-0.185	959040	3.598	0.522407
B7	2014-02-13	February	Winter	15	0	0		4.536	0.0517436	1	18.42	6.21	0.13	0.08	0.43	0.27	30.91		45442654	0.72	0.06	-0.012	959040	4.445	#DIV/0!
B7	2014-02-13	February	Winter	20	0	0		3.96	0.0332519	1	18.35	6.19	0.14	0.09	0.47	0.31	30.73		37272157	0.6	0.05	0.281	959040	4.642	#DIV/0!
B3	2014-02-27	February	Winter	1	0.569879	0	0.166905	5.64	0.0589504	1	22.92	7.21	0.29	0.8	0.43	0.17	75.48		308653344	5.64	0.47	-0.093	1036800	2.521	0.292878
B3	2014-02-27	February	Winter	5	0.0528742	0	0.0165917	4.632	0.038574	1	20.35	7.39	0.18	0.42	0.27	0.12	44.15		117413337	1.92	0.16	-0.164	1036800	3.272	0.313797
B3	2014-02-27	February	Winter	15	0.00012057	0	3.78345e-05	5.928	0.0724475	1	19.99	6.61	0.15	0.09	0.43	0.28	31.15		29586668	0.48	0.04	0.068	1036800	4.729	0.313797
B3	2014-02-27	February	Winter	20	6.01e-06	0	1.88592e-06	4.392	0.03909	1	19.92	5.88	0.09	0.08	0.56	0.37	24.53		107893337	1.8	0.15	0.023	1036800	5.004	0.313797
B7	2014-03-11	March	Winter	1	0.367725	0	0.222772	39.696	0.353864	0	20.06	7.66	0.19	0.69	0.28	0.13	43.08	373	193293340	3.48	0.29	0.005	1555200	3.567	0.605812
B7	2014-03-11	March	Winter	5	0.0504243	0	0.0305477	6.408	0.0685043	1	18.42	5.71	0.14	0.14	0.44	0.3	28.66	344	94080003	1.68	0.14	0.193	1555200	4.872	0.605812
B7	2014-03-11	March	Winter	15	7.771e-05	0	4.70776e-05	3.912	0.0389162	1	18.06	5.15	0.11	0.07	0.53	0.38	24.07	338	59173335	0.96	0.08	0.321	1555200	5.068	0.605812
B7	2014-03-11	March	Winter	20	2.06e-06	0	1.24797e-06	5.16	0.0418309	1	18.85	5.17	0.12	0.08	0.56	0.41	23.86	336	56933335	0.96	0.08	0.41	1555200	5.208	0.605812
B7	2014-04-09	April	Spring	1	10.9075	1	12.0368	4.368	0.0598137	1	15.99	1.16	0.19	0.13	0.36	0.05	22.5		527800455	10.08	0.84	1.203	1321920	4.314	1.10354
B7	2014-04-09	April	Spring	5	2.44519	1	2.60057	3.816	0.0253558	1	15.35	1.26	0.19	0.13	0.31	0.05	22.54		307537273	6	0.5	1.2	1321920	4.314	1.06354
B7	2014-04-09	April	Spring	15	0.00376157	0	0.00400059	7.824	0.0653839	1	15.92	1.2	0.19	0.12	0.35	0.04	22.64		560181913	10.92	0.91	1.193	1321920	4.316	1.06354
B7	2014-04-09	April	Spring	20	0.00013599	0	0.000144631	3.816	0.0404392	1	17.21	3.04	0.23	0.16	0.44	0.15	24.53		481825711	9.12	0.76	0.779	1321920	5.057	1.06354
B3	2014-04-23	April	Spring	1	7.26042	1	7.83411	4.464	0.0228458	1	15.42	0.76	0.09	0.19	0.33	0.05	18.76	349	672795289	13.08	1.09	3.24	9158400	4.101	1.07902
B3	2014-04-23	April	Spring	5	1.51298	1	1.63252	3.696	0.0143379	1	15.21	0.79	0.09	0.2	0.31	0.06	18.69	353	481249720	9.48	0.79	2.331	9158400	4.367	1.07902
B3	2014-04-23	April	Spring	15	0.00341222	0	0.00368184	2.256	0.0221596	1	15.99	1.11	0.11	0.32	0.32	0.05	18.66	343	576340848	10.92	0.91	2.087	9158400	4.432	1.07902
B3	2014-04-23	April	Spring	20	0.00015835	0	0.000170862	4.488	0.0231391	1	16.35	1.36	0.13	0.34	0.34	0.05	18.94	345	635900613	12.48	1.04	1.883	9158400	4.587	1.07902
B7	2014-05-05	May	Spring	1	3.63431	1	2.90556	7.21508	0.0764839	1	15.21	0.09	0.07	0.08	0.34	0.03	23.46	389	853609023	16.44	1.37	6.146	6.53184e+06	0.167	0.799479
B7	2014-05-05	May	Spring	5	0.527205	0	0.42149	7.2	0.0250185	1	15.21	0.09	0.08	0.09	0.35	0.03	23.61	386	941555534	18.12	1.51	4.491	6.53184e+06	0.581	0.799479
B7	2014-05-05	May	Spring	15	0.00074227	0	0.000593429	12.408	0.0574974	0	17.56	1.43	0.14	0.12	0.35	0.03	20.97	345	521684751	9.48	0.79	3.359	6.53184e+06	4.341	0.799479
B7	2014-05-05	May	Spring	20	2.72e-05	0	2.17458e-05	6.072	0.0719772	1	19.42	2.19	0.17	0.15	0.42	0.06	21.36	335	289606164	5.16	0.43	2.586	6.53184e+06	4.359	0.799479
B3	2014-05-19	May	Spring	5	0.900819	1	0.585514	10.392	0.0361644	1	21.2	0.06	0.07	0.2	0.48	0.05	23.75	400	722682344	13.32	1.11	6.081	4510080	4.057	0.649979
B3	2014-05-19	May	Spring	15	0.00319068	0	0.00207388	3.504	0.109495	1	16.71	0.11	0.06		0.28	0.01	21.4	365	311346756	5.64	0.47	3.774	4510080	4.626	0.649979
B3	2014-05-19	May	Spring	20	0.00019631	0	0.000127597	6.096	0.0392477	1	17.28	0.36	0.1	0.07	0.31	0.02	21.26	354	231541783	3.96	0.33	3.282	4510080	4.809	0.649979
B7	2014-06-03	June	Summer	1	3.21261	1	1.85762	14.52	0.0632514	0	18.13	0.34	0.04	0.09	0.49		25.32		781740026	13.8	1.15	10.393	4752000	3.508	0.578228
B7	2014-06-03	June	Summer	15	0.00252781	0	0.00146165	3.672	0.125599	1	18.28	0.72	0.06	0.19	0.34		25.46		519480017	8.64	0.72	5.584	4752000	4.228	0.578228
B7	2014-06-03	June	Summer	20	0.00018156	0	0.000104983	4.344	0.0410725	1	20.06	1.42	0.09	0.19	0.42		26.35		430920014	7.68	0.64	4.545	4752000	4.804	0.578228
B3	2014-06-12	June	Summer	5	2.98743	1	2.3827	24.456	0.121497	0	16.06		0.06	0.13	0.26	0.01	25.56	415	898020030	15.72	1.31	11.719	4242240	3.518	0.797576
B3	2014-06-12	June	Summer	15	0.0725637	0	0.0578751	9.144	0.0412952	1	17.06	0.63	0.11	0.2	0.24	0.01	21.22	409	375840013	6.36	0.53	5.741	4242240	4.754	0.797576
B3	2014-06-12	June	Summer	20	0.0118335	0	0.00943808	4.416	0.036085	1	16.85	1.05	0.14	0.19	0.23	0.02	21.61	407	315540011	5.4	0.45	4.822	4242240	4.962	0.797576
B7	2014-06-30	June	Summer	1	2.43673	1	1.13998	7.296	0.0206258	1	15.71		0.05	0.09	0.26	0.01	24.53	370	1242275112	21.24	1.77	11.976	1442880	3.415	0.467831
B7	2014-06-30	June	Summer	5	0.660501	0	0.309003	9.24	0.0305063	1	15.99	0.04	0.04	0.11	0.27	0.02	24.21	372	1045446703	17.76	1.48	11.829	1442880	3.493	0.467831
B7	2014-06-30	June	Summer	15	0.00662437	0	0.00309909	6.168	0.0229287	1	17.35		0.05	0.13	0.29	0.03	23.96	393	536804752	8.76	0.73	9.812	1442880	4.042	0.467831
B7	2014-06-30	June	Summer	20	0.00051151	0	0.0002393	7.824	0.0333148	1	21.78		0.08	0.14	0.59	0.12	27.77		443602999	7.8	0.65	5.351	1442880	5.065	0.467831
B3	2014-07-28	July	Summer	1	3.6833	1	1.75947	15.072	0.0831598	0	15.64	0.11	0.05		0.3		24.21	392	1192780840	19.32	1.61	19.308	689472	3.244	0.477689
B3	2014-07-28	July	Summer	5	1.12478	1	0.537297	5.472	0.0254269	1	16.14	0.09	0.05	0.09	0.32		23.68	379	1167704375	19.08	1.59	15.468	689472	3.814	0.477689
B3	2014-07-28	July	Summer	15	0.0251537	0	0.0120157	1.632	0.0169291	1	17.63	1.58	0.29	0.84	0.4	0.16	27.17	352	226761794	3.48	0.29	7.336	689472	4.951	0.477689
B3	2014-07-28	July	Summer	20	0.00419913	0	0.00200588	2.04	0.0246369	1	18.63	2.91	0.23	0.69	0.56	0.31	27.31	363	175151822	2.76	0.23	5.314	689472	5.283	0.477689
B7	2014-08-14	August	Summer	1	9.10465	1	18.8473	8.28	0.0242978	1	16.63	0.11	0.06	0.1	0.4	0.03	20.97	393	1761370258	29.16	2.43	19.675	619488	3.168	2.07007
B7	2014-08-14	August	Summer	5	4.14403	1	8.57844	5.232	0.0245851	1	15.42	0.16	0.06	0.15	0.32	0.02	22.79	394	1551528400	24.72	2.06	19.564	619488	3.205	2.07007
B7	2014-08-14	August	Summer	15	0.147879	0	0.306121	9.144	0.0694154	1	15.64	0.96	0.15	1.29	0.36	0.14	30.44	382	294998611	4.44	0.37	12.346	619488	4.041	2.07007
B7	2014-08-14	August	Summer	20	0.0296644	0	0.0614074	1.728	0.0383352	1	17.49	2.06	0.24	1.81	0.55	0.32	32.76	365	364457893	5.52	0.46	10.088	619488	4.393	2.07007
B3	2014-08-27	August	Summer	1	2.09269	1	9.49836	4.392	0.0165346	1	14.99	0.59	0.09	0.5	0.29	0.02	22.82		1087119090	17.52	1.46	15.282	4371840	3.599	4.53883
B3	2014-08-27	August	Summer	5	0.50777	0	2.30468	4.248	0.0152788	1	14.99	0.56	0.09	0.53	0.28	0.02	22.75		1037106780	16.32	1.36	15.323	4371840	3.601	4.53883
B3	2014-08-27	August	Summer	15	0.0111566	0	0.0506377	3.504	0.00738353	1	15.42	0.57	0.08	0.83	0.31	0.05	21.08		1045337786	16.2	1.35	16.394	4371840	4.388	4.53883
B3	2014-08-27	August	Summer	20	0.00159347	0	0.00723249	2.688		1	17.06	1.14	0.11	1.83	0.57	0.29	22.68		713502982	10.68	0.89	16.451	4371840	4.698	4.53883
B7	2014-09-08	September	Autumn	1	2.52466	1	0.848054	5.736	0.0241542	1	19.13	0.14	0.05	0.16	0.39		21.9	428	489476466	7.68	0.64	15.277	1105920	3.849	0.335908
B7	2014-09-08	September	Autumn	5	0.821533	0	0.27596	4.92	0.0226432	1	18.49	0.22	0.05	0.16	0.36		21.9		1191885484	17.76	1.48	15.117	1105920	3.907	0.335908
B7	2014-09-08	September	Autumn	15	0.0200291	0	0.00672794	3.384	0.0131414	1	19.85	2.14	0.12	0.82	0.34	0.08	23.07	400	268670778	3.96	0.33	12.985	1105920	4.91	0.335908
B7	2014-09-08	September	Autumn	20	0.00306234	0	0.00102867	1.872		1	21.2	2.92	0.16	1.25	0.53	0.24	24.67	372	224563321	3.24	0.27	11.864	1105920	5.046	0.335908
B3	2014-09-25	September	Autumn	1	2.49992	1	1.84621	3.624	0.0143359	1	15.64	1.11	0.11	0.19	0.32	0.03	23.75	362	765394108	11.88	0.99	11.827	732672	3.982	0.738507
B3	2014-09-25	September	Autumn	5	0.662037	0	0.488919	3	0.0135351	1	15.85	2.38	0.13	0.24	0.43	0.21	23.75	352	435974926	6.84	0.57	11.195	732672	4.222	0.738507
B3	2014-09-25	September	Autumn	15	0.00694846	0	0.00513149	0.84	0.0090546	1	19.42	5.64	0.14	0.16	1.03	0.83	32.36	340	90272666	1.44	0.12	5.72	732672	5.687	0.738507
B3	2014-09-25	September	Autumn	20	0.00080417	0	0.000593885	0.52	0.009	1	20.85	6.55	0.19	0.27	1.27	1.18	37.03	330	105213731	1.8	0.15	4.905	732672	5.841	0.738507
B7	2014-10-09	October	Autumn	1	0.377862	0	0.113862	3.864	0.0520119	1	16.85	3.18	0.24	0.36	0.56	0.35	26.17	349	295163758	4.44	0.37	8.611	1192320	4.689	0.301333
B7	2014-10-09	October	Autumn	5	0.0441282	0	0.0132973	2.928	0.0360991	1	16.99	3.23	0.21	0.39	0.55	0.31	26.24	349	409629511	6.24	0.52	8.585	1192320	4.689	0.301333
B7	2014-10-09	October	Autumn	20	1.414e-05	0	4.26085e-06	4.608	0.0294175	1	17.13	3.21	0.21	0.41	0.56	0.3	26.31	350	506017569	8.28	0.69	8.152	1192320	4.783	0.301333
B3	2014-10-20	October	Autumn	1	0.812537	0	0.381332	2.4	0.0169084	1	18.13	2.88	0.26	0.26	0.38	0.17	26.7		146157294	2.28	0.19	7.442	2315520	4.198	0.469311
B3	2014-10-20	October	Autumn	5	0.12816	0	0.0601469	3.888	0.0397016	1	18.71	2.9	0.25	0.26	0.4	0.17	26.85		145425287	2.28	0.19	7.399	2315520	4.21	0.469311
B3	2014-10-20	October	Autumn	20	9.887e-05	0	4.64008e-05	2.784		1	19.99	3.92	0.29	1.11	0.62	0.44	31.55		111671655	1.68	0.14	7.882	2315520	4.632	0.469311
B7	2014-12-01	December	Winter	1	0.0157995	0	0.0255318	1.92	0.0162128	1	19.06	4.32	0.19	0.47	0.45	0.23		374	79178701	1.32	0.11	4.239	1252800	3.897	1.61598
B7	2014-12-01	December	Winter	5	0.0018209	0	0.00294255	2.688	0.0232498	1	19.13	4.2	0.18	0.48	0.44	0.23	28.59	372	138495626	2.28	0.19	3.631	1252800	4.195	1.61598
B7	2014-12-01	December	Winter	15	9.42e-06	0	1.52226e-05	3.048	0.0146378	1	19.99	4.38	0.19	0.49	0.52	0.27	28.48	396	82310062	1.32	0.11	4.264	1252800	4.368	1.61598
B3	2015-02-09	February	Winter	1	0.0608764	0	0.109785	3.408	0.0565073	1	19.13	5.03	0.09	0.15	0.52	0.38	23.93	348	95261542	1.68	0.14	0.717	738720	5.05	1.80341
B3	2015-02-09	February	Winter	5	0.0111689	0	0.0201421	4.44	0.0525752	1	19.35	4.93	0.09	0.22	0.53	0.4	23.04	349	99862725	1.68	0.14	0.75	738720	5.096	1.80341
B3	2015-02-09	February	Winter	15	0.00015174	0	0.00027365	4.176	0.0545291	1	19.13	4.88	0.08	0.13	0.54	0.39	22.82	355	95602370	1.68	0.14	0.867	738720	5.188	1.80341
B7	2015-02-24	February	Winter	1	0.172193	0	0.0994752	4.584	0.143941	1	22.2	5.1	0.13	0.11	0.73	0.4	26.95		33013492	0.6	0.05		731808		0.577696
B7	2015-02-24	February	Winter	5	0.0264661	0	0.0147161	4.584	0.0301513	1	20.78	5.13	0.13	0.13	0.64	0.39	26.85		31582013	0.6	0.05		731808		0.556036
B7	2015-02-24	February	Winter	15	0.00019988	0	0.000111141	4.44	0.0638995	1	21.35	5.16	0.12	0.11	0.76	0.41	26.13		38023670	0.72	0.06		731808		0.556036
B7	2015-02-24	February	Winter	20	1.682e-05	0	8.89465e-06	3.912	0.0491934	1	23.27	5.16	0.13	0.12	0.7	0.42	26.56		356169953	6.36	0.53		731808		0.528814
B3	2015-03-09	March	Winter	1	0.542083	0	0.264718	5.496	0.0625964	1	21.7	7.59	0.19	0.12	0.62	0.42	28.7		88035979	1.56	0.13	0.819	716256	4	0.488334
B3	2015-03-09	March	Winter	5	0.126168	0	0.0616119	4.656	0.0463853	1	20.7	6.08	0.18	0.14	0.6	0.36	28.66		76584145	1.44	0.12	0.608	716256	4.681	0.488334
B3	2015-03-09	March	Winter	15	0.00053134	0	0.000259472	3.912	0.0356528	1	21.06	6	0.19	0.15	0.67	0.43	27.88		60122132	1.08	0.09	0.687	716256	4.866	0.488334
B3	2015-03-09	March	Winter	20	3.43e-05	0	1.67499e-05	3.264	0.0381493	1	21.56	6.15	0.19	0.15	0.73	0.46	27.13		58153848	1.08	0.09	0.71	716256	4.908	0.488334
B7	2015-03-31	March	Winter	1	5.01138	1	3.84837	0.312	0.024	1	19.35	4.15	0.22	0.18	0.46	0.1	27.7	358	161867329	3	0.25	0.869	730944	4.303	0.767927
B7	2015-03-31	March	Winter	5	1.44914	1	1.11284	4.632	0.048	1	19.06	4.08	0.23	0.19	0.44	0.11	27.59	364	177723720	3.24	0.27	0.883	730944	4.315	0.767927
B7	2015-03-31	March	Winter	15	0.0300864	0	0.0231042	12.456	0.096	1	18.35	3.16	0.24	0.19	0.45	0.08	26.77	372	227440114	4.32	0.36	0.944	730944	4.371	0.767927
B7	2015-03-31	March	Winter	20	0.00428509	0	0.00329064	6.192	0.048	1	18.49	3.49	0.23	0.2	0.41	0.09	26.92	365	234790212	4.44	0.37	0.973	730944	4.441	0.767927
B3	2015-04-09	April	Spring	1	3.62525	1	2.67313	4.752	0.048	1	18.99	4.01	0.15	0.19	0.59	0.31	26.03		149727279	2.76	0.23	1.945	1788480	5.07	0.737365
B3	2015-04-09	April	Spring	5	1.85833	1	1.37027	3.6	0.048	1	18.85	4.03	0.14	0.17	0.56	0.31	26.1		169878110	3	0.25	1.938	1788480	5.092	0.737365
B3	2015-04-09	April	Spring	15	0.0432992	0	0.0319274	3.96	0.072	1	19.56	4.58	0.13	0.19	0.73	0.43	26.03		124621326	2.28	0.19	2.057	1788480	5.297	0.737365
B3	2015-04-09	April	Spring	20	0.00620923	0	0.00457847	3.504	0.024	1	19.78	4.92	0.1	0.16	0.81	0.53	26.88		89027031	1.56	0.13	2.174	1788480	5.424	0.737365
B7	2015-04-20	April	Spring	1	10.9175	1	3.27062	10.464	0.048	1	15.78		0.09	0.08	0.41	0.06	15.63	374	280958916	5.64	0.47	3.478	6635520	4.863	0.299577
B7	2015-04-20	April	Spring	5	1.1877	1	0.355808	11.424	0.072	1	15.49	0.11	0.07	0.08	0.41	0.06	15.59	374	334879521	6.84	0.57	3.326	6635520	4.98	0.299577
B7	2015-04-20	April	Spring	15	0.00129204	0	0.000387066	6.96	0.024	1	15.56	1	0.11	0.11	0.4	0.12	17.48	366	223067720	4.44	0.37	3.039	6635520	5.215	0.299577
B7	2015-04-20	April	Spring	20	2.966e-05	0	8.88546e-06	6.024	0.048	1	16.56	1.47	0.12	0.12	0.44	0.15	18.73	357	202103007	3.96	0.33	2.86	6635520	5.253	0.299577
B3	2015-05-05	May	Spring	1	6.45657	1	1.74015	16.968	0.048	1	16.14		0.07	0.11	0.43	0.06	22.5	411	513581714	10.2	0.85	5.208	8726400	3.622	0.269517
B3	2015-05-05	May	Spring	5	0.462207	0	0.124573	13.8	0.096	1	16.49		0.06	0.11	0.43	0.04	20.9	397	450692461	9	0.75	4.959	8726400	3.856	0.269517
B3	2015-05-05	May	Spring	15	0.00046872	0	0.000126328	7.512	0.048	1	15.71		0.07	0.09	0.31	0.04	17.66	408	143806203	2.76	0.23	3.991	8726400	4.234	0.269517
B3	2015-05-05	May	Spring	20	3.93e-06	0	1.0592e-06	4.488	0.024	1	15.85		0.06	0.11	0.33	0.05	16.81	390	281713942	5.28	0.44	3.748	8726400	4.525	0.269517
B7	2015-05-18	May	Spring	1	5.59252	1	2.6854	12.192	0.048	1	18.13		0.05	0.12	0.41	0.03	23.29	392	456525015	8.4	0.7	5.693	11923200	3.855	0.480177
B7	2015-05-18	May	Spring	5	0.746903	0	0.358645	10.8	0.096	0	18.21	0.18	0.06	0.11	0.37	0.02	23.43	397	445725015	8.16	0.68	5.763	11923200	3.839	0.480177
B7	2015-05-18	May	Spring	15	0.00134382	0	0.000645271	6.144	0.048	1	16.35	0.26	0.09	0.12	0.28	0.03	21.9	368	146550005	2.52	0.21	3.942	11923200	4.515	0.480177
B7	2015-05-18	May	Spring	20	5.886e-05	0	2.82632e-05	4.632	0.024	1	17.85	0.43	0.09	0.12	0.42	0.04	21.72	348	218325007	3.96	0.33	3.406	11923200	4.858	0.480177
B3	2015-05-26	May	Spring	1	3.96129	1	2.40029	10.584	0.072	1	16.28	0.1	0.08	0.13	0.29	0.02	27.1		502470017	9	0.75	6.583	7.24896e+06	3.697	0.605935
B3	2015-05-26	May	Spring	5	0.448619	0	0.271834	5.088	0.024	1	15.35	0.1	0.07	0.13	0.28	0.01	24.1		563490019	9.96	0.83	6.776	7.24896e+06	3.767	0.605935
B3	2015-05-26	May	Spring	15	0.00087978	0	0.00053309	7.488	0.024	1	14.85	0.09	0.08	0.12	0.28	0.01	22.04		453690015	8.04	0.67	6.237	7.24896e+06	3.917	0.605935
B3	2015-05-26	May	Spring	20	3.522e-05	0	2.1341e-05	4.992	0.024	1	14.71	0.09	0.09	0.11	0.27	0.01	21.72		414090014	7.32	0.61	5.029	7.24896e+06	4.295	0.605935
B3	2015-06-15	June	Summer	1	3.72538	1	2.26163	5.736	0.024	1	14.56	0.05	0.05	0.09	0.23	0.02	19.73	388	502380017	8.76	0.73	9.293	3844800	3.856	0.607087
B3	2015-06-15	June	Summer	5	2.27185	1	1.37921	5.424	0.048	1	15.06		0.05	0.1	0.28		19.8	389	627120021	10.92	0.91	9.07	3844800	3.896	0.607087
B3	2015-06-15	June	Summer	15	0.0853675	0	0.0518255	3.984	0.024	1	15.64	0.43	0.09	0.9	0.26	0.02	19.55	370	304290010	5.16	0.43	6.187	3844800	4.456	0.607087
B3	2015-06-15	June	Summer	20	0.0154508	0	0.00937997	4.152	0.024	1	16.06	0.39	0.12	1.19	0.29	0.03	17.66	358	318754296	5.28	0.44	5.326	3844800	4.874	0.607087
B7	2015-06-29	June	Summer	1	5.21442	1	1.86557	4.752	0.024	1	13.35				0.21		20.97	379	743770832	13.32	1.11	9.293	2643840	3.856	0.357771
B7	2015-06-29	June	Summer	5	2.34877	1	0.840322	5.544	0.048	1	14.06				0.22		20.69	387	709226703	12.96	1.08	9.07	2643840	3.896	0.357771
B7	2015-06-29	June	Summer	15	0.0772381	0	0.0276336	3.72	0.048	1	13.92				0.2		18.19	347	213538305	3.6	0.3	6.187	2643840	4.456	0.357771
B3	2015-08-10	August	Summer	1	1.64841	1	1.06615	12.528	0.072	1	14.92		0.08		0.3	0.03	26.06		845884172	14.76	1.23	15.33	4933440	2.915	0.646775
B3	2015-08-10	August	Summer	5	0.254167	0	0.164389	5.472	0.024	1	14.35		0.08		0.24	0.03	26.31		933242268	15.96	1.33	15.187	4933440	3.017	0.646775
B3	2015-08-10	August	Summer	15	0.0006898	0	0.000446146	3.168	0.024	1	15.99	1.79	0.15	0.19	0.21	0.04	22.82		348735608	5.52	0.46	9.207	4933440	4.304	0.646775
B3	2015-08-10	August	Summer	20	3.911e-05	0	2.52954e-05	3.336	0.024	1	16.14	2.9	0.18	0.61	0.32	0.13	27.06		323825922	5.16	0.43	7.311	4933440	4.694	0.646775
B7	2015-08-24	August	Summer	1	5.98243	1	2.04255	8.928	0.048	1	15.92		0.1	0.26	0.27	0.02	33.36	463	1029010545	18	1.5	16.497	1321920	2.686	0.341425
B7	2015-08-24	August	Summer	5	2.10483	1	0.718641	6.744	0.024	1	14.49	0.12	0.07	0.12	0.25	0.01	27.38	418	899056357	14.76	1.23	15.893	1321920	2.952	0.341425
B7	2015-08-24	August	Summer	15	0.0132535	0	0.0045251	3.624	0.024	1	18.85	3.14	0.17	1.97	0.38	0.18	29.8	357	190682099	3.12	0.26	9.672	1321920	4.252	0.341425
B7	2015-08-24	August	Summer	20	0.00119089	0	0.0004066	1.512	0.024	1	20.06	3.3	0.19	2.54	0.63	0.37	34.82	355	145711576	2.4	0.2	8.812	1321920	4.434	0.341425
B3	2015-09-08	September	Autumn	5	0.641744	0	0.350641	1.8	0.024	1	14.64	0.36	0.07	0.15	0.24	0.02	22.57	378	940680031	15	1.25	13.726	852768	3.411	0.546388
B3	2015-09-08	September	Autumn	15	0.00295565	0	0.00161493	4.824	0.024	1	17.35	3.23	0.12	0.32	0.32	0.13	25.78	355	111330004	1.68	0.14	9.516	852768	4.395	0.546388
B3	2015-09-08	September	Autumn	20	0.0001956	0	0.000106873	4.416	0.024	1	18.56	4.25	0.12	0.27	0.54	0.34	27.27	348	90990003	1.44	0.12	7.172	852768	4.867	0.546388
B7	2015-09-24	September	Autumn	1	0.680935	0	1.18832	1.656	0.024	1	16.63	0.53	0.08	0.29	0.31	0.03	24.71		906965248	13.92	1.16	13.173	3.60288e+06	3.21	1.74513
B7	2015-09-24	September	Autumn	5	0.0955623	0	0.166769	1.8	0.024	1	15.85	0.38	0.07	0.34	0.29	0.02	22.54		794817418	12.72	1.06	13.16	3.60288e+06	3.305	1.74513
B7	2015-09-24	September	Autumn	15	0.00040711	0	0.00071046	3.912	0.024	1	18.56	3.54	0.14	0.79	0.43	0.23	29.16		240026095	3.72	0.31	9.426	3.60288e+06	4.439	1.74513
B7	2015-09-24	September	Autumn	20	2.794e-05	0	4.87589e-05	3.984	0.024	1	19.42	4.63	0.17	0.8	0.6	0.4	31.23		149165222	2.28	0.19	8.465	3.60288e+06	4.692	1.74513
B3	2015-10-05	October	Autumn	1	0.724392	0	0.312779	2.784	0.024	1	18.49		0.16	0.21	0.55	0.36	26.49	327	108473688	1.8	0.15	7.605	1.89216e+06	4.746	0.431782
B3	2015-10-05	October	Autumn	5	0.349308	0	0.150825	2.64	0.024	1	18.42		0.16	0.19	0.55	0.36	26.45	329	150915795	2.52	0.21	7.515	1.89216e+06	4.802	0.431782
B3	2015-10-05	October	Autumn	20	0.00500579	0	0.00216141	2.376	0.024	1	19.21		0.15	0.16	0.83	0.65	28.98	318	68305265	1.08	0.09	5.746	1.89216e+06	5.248	0.431782
B7	2015-11-04	November	Winter	1	1.19599	1	0.258667	3.72	0.024	1	16.78	2.6	0.19	0.24	0.37	0.15	28.73	367	279929132	4.44	0.37	6.302	1114560	4.102	0.216278
B7	2015-11-04	November	Winter	5	0.199322	0	0.0431091	4.416	0.048	1	16.78	2.53	0.19	0.21	0.37	0.15	28.7	370	285416231	4.44	0.37	6.309	1114560	4.107	0.216278
B7	2015-11-04	November	Winter	15	0.00150273	0	0.000325008	4.2	0.048	1	16.56	2.77	0.2	0.24	0.35	0.15	26.21	358	295083976	4.68	0.39	6.426	1114560	4.171	0.216278
B7	2015-11-04	November	Winter	20	0.00013085	0	2.83e-05	3.12	0.024	1	16.71	2.72	0.2	0.37	0.4	0.18	27.06	352	201193620	3.24	0.27	6.545	1114560	4.237	0.216278
B3	2015-11-30	November	Winter	1	0.0171603	0	0.00720509	3.552	0.168	1	19.92	4.44	0.19	0.29	0.77	0.51	30.19	338	149058728	2.52	0.21	4.251	907200	4.611	0.41987
B3	2015-11-30	November	Winter	5	0.00241986	0	0.00101603	4.008	0.096	1	19.85	4.46	0.19	0.33	0.71	0.49	30.16	334	91800066	1.56	0.13	4.246	907200	4.613	0.41987
B3	2015-11-30	November	Winter	15	1.898e-05	0	7.96914e-06	4.464	0.096	1	20.13	4.49	0.19	0.33	0.78	0.56	30.23	341	143751828	2.4	0.2	4.284	907200	4.631	0.41987
B3	2015-11-30	November	Winter	20	0	0		3.912	0.168	1	20.78	4.65	0.22	0.36	1.05	0.7	29.27	335	175500127	3	0.25	4.329	907200	4.654	#DIV/0!
B7	2016-03-16	March	Winter	1	0.692194	0	0.784348	2.04	0.12	1	19.63	6.27	0.15	0.14	0.31	0.11	32.15	362	14140572	0.24	0.02	0.325	749952	109.24	1.13313
B7	2016-03-16	March	Winter	5	0.165015	0	0.186984	2.64	0.216	1	19.92	7.75	0.17	0.2	0.3	0.12	32.12	368	7988505	0.12	0.01	0.015	749952	10.36	1.13313
B7	2016-03-16	March	Winter	15	0.00113476	0	0.00128584	1.73	0.12	1	19.99	6.86	0.2	0.23	0.36	0.18	29.23	361	7437573	0.12	0.01	-0.033	749952	0.25	1.13313
B7	2016-03-16	March	Winter	20	9.503e-05	0	0.000107682	3.072	0.096	1	19.85	6.23	0.21	0.21	0.39	0.23	27.56	352	10651340	0.24	0.02	0.121	749952	0.09	1.13313
B3	2016-03-30	March	Winter	1	1.551	1	1.16665	4.056	0.096	1	17.99	5.45	0.19	0.25	0.33	0.07	30.76	356	150863371	2.76	0.23	0.525	1.01088e+06	157.8	0.752191
B3	2016-03-30	March	Winter	5	0.33522	0	0.252149	3.432	0.12	1	18.49	4.78	0.18	0.21	0.31	0.06	30.01	349	154811713	2.76	0.23	0.536	1.01088e+06	20.42	0.752191
B3	2016-03-30	March	Winter	15	0.00461252	0	0.0034695	6.192	0.216	1	18.99	5.69	0.17	0.49	0.34	0.15	25.67	347	100177686	1.8	0.15	0.616	1.01088e+06	0.44	0.752191
B3	2016-03-30	March	Winter	20	0.00053626	0	0.00040337	5.232	0.312	1	19.7	8.05	0.16	1	0.44	0.28	23.32	336	78140432	1.32	0.11	0.688	1.01088e+06	0.02	0.752191
B3	2016-04-18	April	Spring	1	2.92758	1	3.14889	8.232	0.12	1	14.64	0.61	0.11	0.1	0.28	0.03	26.28	366	550586860	10.08	0.84	2.297	3706560	350.79	1.0756
B3	2016-04-18	April	Spring	5	0.563847	0	0.606472	6.456	0.096	1	15.06	0.88	0.13	0.09	0.26	0.03	26.06	364	585303177	11.04	0.92	2.192	3706560	26.63	1.0756
B3	2016-04-18	April	Spring	15	0.00213678	0	0.00229831	2.664	0.072	1	17.56	3.76	0.24	0.11	0.21	0.02	25.67	343	166817374	2.76	0.23	0.872	3706560	0.28	1.0756
B3	2016-04-18	April	Spring	20	0.00013483	0	0.000145023	1.656	0.024	1	17.92	4.48	0.25	0.1	0.18	0.04	24.92	340	94997372	1.56	0.13	0.866	3706560	0	1.0756
B7	2016-05-02	May	Spring	1	5.96921	1	4.01031	12.552	0.12	1	19.7	0.64	0.14	0.17	0.52	0.11	41.66	450	733153402	13.56	1.13	5.18	9504000	1812.1	0.671832
B7	2016-05-02	May	Spring	5	1.20974	1	0.812742	8.952	0.048	1	17.13	1.04	0.13	0.13	0.37	0.05	33.97	393	793415694	14.4	1.2	3.596	9504000	21.3	0.671832
B7	2016-05-02	May	Spring	15	0.0030923	0	0.00207751	3.384	0.024	1	16.06	1.69	0.16	0.14	0.26	0.02	25.53	365	339153682	5.88	0.49	2.25	9504000	0.16	0.671832
B7	2016-05-02	May	Spring	20	0.00015839	0	0.000106411	3.168	0.048	1	16.99	2.41	0.18	0.15	0.26	0.03	24.89	353	255885729	4.44	0.37	1.995	9504000	0.06	0.671832
B3	2016-05-13	May	Spring	1	3.07714	1	1.31648	7.536	0.216	1									679907113	11.88	0.99	6.043	16934400	1761.9	0.427827
B3	2016-05-13	May	Spring	5	0.693997	0	0.29691	9.816	0.264	1	17.42	0.37	0.12	0.23	0.3	0.03	32.26	394	968259201	16.56	1.38	5	16934400	9.35	0.427827
B3	2016-05-13	May	Spring	15	0.00245095	0	0.00104858	2.904	0.192	1	16.63	0.57	0.12	0.26	0.26	0.02	28.95	377	575086816	9.48	0.79	3.972	16934400	0.09	0.427827
B3	2016-05-13	May	Spring	20	0.00014478	0	6.19407e-05	2.208	0.072	1	17.63	1.23	0.16	0.33	0.24	0.02	27.95	364	416816640	6.84	0.57	3.379	16934400	0.05	0.427827
B7	2016-05-24	May	Spring	1	2.97354	1	1.56039	12.24	0.048	0	21.06		0.09	0.14	0.51	0.05	39.52	472	1026884631	17.04	1.42	8.948	4864320	202.56	0.524759
B7	2016-05-24	May	Spring	5	0.223706	0	0.117392	13.032	0.144	1	18.99	0.04	0.09	0.16	0.4	0.04	37.03	460	918290495	15	1.25	8.811	4864320	4.74	0.524759
B7	2016-05-24	May	Spring	20	3.24e-06	0	1.70022e-06	14.904	0.024	0	23.27	1.91	0.14	0.2	0.57	0.1	28.56	348	553691461	9	0.75	4.673	4864320	0.06	0.524759
B3	2016-06-13	June	Summer	1	2.77557	1	3.06406	16.56	0.264	1	16.78	0.11	0.09		0.32	0.02	25.49	358	782524721	13.56	1.13	6.926	1339200	1158.8	1.10394
B3	2016-06-13	June	Summer	5	1.08083	1	1.19316	17.376	0.288	0	16.99	0.24	0.08	0.06	0.33	0.02	26.35	359	807293425	13.68	1.14	6.052	1339200	116.11	1.10394
B3	2016-06-13	June	Summer	15	0.0139253	0	0.0153727	7.032	0.048	1	19.21	3.18	0.19	0.12	0.34	0.1	28.59	337	263490962	4.44	0.37	3.991	1339200	2.13	1.10394
B7	2016-06-28	June	Summer	1	7.04272	1	4.45076	15.168	0.144	0	14.99		0.06	0.07	0.3	0.02	28.88	385	1346383210	22.56	1.88	12.222	2592000	456.82	0.631966
B7	2016-06-28	June	Summer	5	2.08881	1	1.32005	12.696	0.096	1	15.14		0.05	0.09	0.26	0.02	26.38		1139862792	19.08	1.59	12.069	2592000	58.41	0.631966
B7	2016-06-28	June	Summer	15	0.0275337	0	0.0174004	17.544	0.12	0	15.56	0.14	0.04	0.11	0.31	0.02	21.26	378	734506068	11.52	0.96	11.17	2592000	1.09	0.631966
B3	2016-07-18	July	Summer	1	3.67375	1	3.3524	10.728	0.096	1	17.63	0.14	0.03		0.3	0.02	23.75	388	1033631330	18.12	1.51	15.757	1900800	271.45	0.912529
B3	2016-07-18	July	Summer	5	0.754113	0	0.68815	8.472	0.072	1	17.92	0.06	0.03		0.33	0.02	23.78	388	861821545	14.88	1.24	13.238	1900800	25.88	0.912529
B3	2016-07-18	July	Summer	15	0.0059757	0	0.005453	4.848	0.072	1	17.06	0.91	0.06		0.25	0.02	27.95	356	273287540	4.2	0.35	8.119	1900800	0.49	0.912529
B3	2016-07-18	July	Summer	20	0.00054844	0	0.000500467	4.44	0.048	1	18.78	2.08	0.15		0.25	0.04	29.27	348	265801476	4.08	0.34	6.135	1900800	0.07	0.912529
B7	2016-08-16	August	Summer	1	3.15609	1	1.79798	6.744	0.096	1	15.64	1.52	0.13	0.31	0.31	0.06	22.75	355	635398524	9.84	0.82	14.222	1615680	161.09	0.569685
B7	2016-08-16	August	Summer	5	1.03488	1	0.589556	7.032	0.096	1	15.85	1.5	0.14	0.34	0.29	0.05	22.61	357	664404364	10.56	0.88	13.853	1615680	23.07	0.569685
B7	2016-08-16	August	Summer	15	0.0145816	0	0.00830694	3.576	0.096	1	16.85	1.29	0.13	1.5	0.37	0.13	23.04	345	557082755	8.16	0.68	13.727	1615680	0.48	0.569685
B7	2016-08-16	August	Summer	20	0.00169412	0	0.000965114	4.536	0.072	1	17.56	2.38	0.15	1.62	0.38	0.15	23.25	348	576619042	8.76	0.73	13.681	1615680	0.15	0.569685
B7	2016-09-12	September	Autumn	1	2.9533	1	2.13606	7.584	0.096	1	17.92		0.06	0.07	0.33	0.03	23.57	363	362765647	6	0.5	12.948	1330560	64.3	0.723277
B7	2016-09-12	September	Autumn	5	0.688244	0	0.497791	7.248	0.048	1	17.71	0.08	0.06	0.12	0.35	0.03	23.5	361	464279209	7.56	0.63	12.189	1330560	4.33	0.723277
B7	2016-09-12	September	Autumn	15	0.00193173	0	0.00139718	3.648	0.096	1	18.99	2.47	0.14	0.8	0.46	0.25	27.34	341	163673850	2.64	0.22	10.713	1330560	0.35	0.723277
B7	2016-09-12	September	Autumn	20	9.912e-05	0	7.16912e-05	1.632	0.072	1	21.06	3.81	0.17	1.12	0.66	0.47	31.23	338	120474686	1.92	0.16	9.731	1330560	0.15	0.723277
B3	2016-11-07	November	Winter	1	0.184117	0	0.105469	4.536	0.024	1	22.28	3.66	0.16	0.51	0.46	0.19	29.02	354	180024851	2.88	0.24	4.576	666144	4.77	0.572835
B3	2016-11-07	November	Winter	5	0.00850307	0	0.00487086	4.728	0.312	1	19.56	3.79	0.16	0.56	0.45	0.19	28.98	358	218060470	3.48	0.29	4.407	666144	0.42	0.572835
B3	2016-11-07	November	Winter	15	4.99e-06	0	2.85845e-06	4.248	0.048	1	19.7	4.14	0.16	0.47	0.43	0.2	28.88	349	143082658	2.28	0.19	4.471	666144	0.07	0.572835
B3	2016-11-07	November	Winter	20	0	0		1.104	0.12	1	21.49	5.1	0.13	0.59	0.83	0.56	31.44	343	101063843	1.56	0.13	4.628	666144	0.06	#DIV/0!
B7	2016-11-21	November	Winter	1	0.02359	0	0.0191105	5.592	0.216	1	20.56	5.04	0.18	0.49	0.55	0.3	33.29	369	235288551	3.96	0.33	3.569	1408320	1.92	0.810113
B7	2016-11-21	November	Winter	5	0.00251605	0	0.00203828	4.752	0.12	1	21.42	4.9	0.18	0.48	0.56	0.3	33.79	374	182992727	3.12	0.26	3.006	1408320	0.14	0.810113
B7	2016-11-21	November	Winter	15	1.008e-05	0	8.16594e-06	4.968	0.312	1	20.13	4.82	0.17	0.49	0.5	0.31	32.33	373	257640110	4.44	0.37	3.108	1408320	0.07	0.810113
B7	2016-11-21	November	Winter	20	0	0		2.544	0.24	1	20.56	5.22	0.2	0.84	0.64	0.48	32.33	368	202699637	3.6	0.3	3.743	1408320	0.07	#DIV/0!
B3	2016-12-05	December	Winter	1	0.0179639	0	0.00929413	2.448	0.168	1	22.92	5.92	0.15	0.21	1.35	0.94	33.72	333	66716120	1.2	0.1	3.957	1088640	8.92	0.517379
B3	2016-12-05	December	Winter	15	1.79e-06	0	9.26109e-07	1.728	0.096	1	21.7	6.76	0.15	0.27	1.3	1.06	35.6	328	20621346	0.36	0.03	3.771	1088640	0.08	0.517379
B3	2016-12-05	December	Winter	20	0	0		1.848	0.24	1	22.92	6.67	0.15	0.24	1.35	1.12	36.67	333	47827660	0.84	0.07	3.843	1088640	0.07	#DIV/0!
								190
